# Supplementary material
Source: PubMed Central journal article supplement (PMC2652407)
Supplement: jm801126a_si_001.pdf [file jm801126a_si_001.pdf]

## Supporting Information

New insights into the design of inhibitors of human *S*-adenosylmethionine decarboxylase: Studies of adenine C<sup>8</sup> substitution in structural analogues of AdoMetDC

Diane E. McCloskey, Shridhar Bale, John A. Secrist III, Anita Tiwari, Thomas H. Moss III, Jacob Valiyaveetil, Wesley Brooks, Wayne C. Guida, Anthony E. Pegg and Steven E. Ealick

**Purity as Evidenced by Elemental Analyses of the Target compounds**

| Compound   | Empirical Formula                                                                                                                                           | Calculated, % |      |       |       | Found, % |      |       |       |
|------------|-------------------------------------------------------------------------------------------------------------------------------------------------------------|---------------|------|-------|-------|----------|------|-------|-------|
|            |                                                                                                                                                             | C             | H    | N     | S     | C        | H    | N     | S     |
| <b>5</b>   | C <sub>13</sub> H <sub>21</sub> N <sub>7</sub> O <sub>4</sub> .1.0 H <sub>2</sub> SO <sub>4</sub> .0.5C <sub>2</sub> H <sub>5</sub> OH.1.0H <sub>2</sub> O  | 35.14         | 5.90 | 20.49 |       | 34.91    | 6.06 | 20.69 |       |
| <b>12a</b> | C <sub>14</sub> H <sub>23</sub> N <sub>7</sub> O <sub>4</sub> .2.2H <sub>2</sub> SO <sub>4</sub> .0.1C <sub>2</sub> H <sub>5</sub> OH.0.5H <sub>2</sub> O   | 29.26         | 5.01 | 16.82 |       | 29.48    | 5.21 | 16.47 |       |
| <b>12b</b> | C <sub>14</sub> H <sub>24</sub> N <sub>8</sub> O <sub>4</sub> .2.1H <sub>2</sub> SO <sub>4</sub> .0.3C <sub>2</sub> H <sub>5</sub> OH.0.2H <sub>2</sub> O   | 29.63         | 5.17 | 18.93 | 11.37 | 29.43    | 5.20 | 19.05 | 11.13 |
| <b>12c</b> | C <sub>19</sub> H <sub>25</sub> N <sub>7</sub> O <sub>4</sub> .2.0H <sub>2</sub> SO <sub>4</sub> .3H <sub>2</sub> O                                         | 34.28         | 5.29 | 14.72 | 9.63  | 34.21    | 5.34 | 14.59 | 9.59  |
| <b>14a</b> | C <sub>16</sub> H <sub>28</sub> N <sub>8</sub> O <sub>4</sub> .0.4H <sub>2</sub> SO <sub>4</sub> .0.2C <sub>2</sub> H <sub>5</sub> OH.0.9H <sub>2</sub> O   | 42.71         | 6.95 | 24.30 | 2.78  | 42.53    | 6.84 | 24.16 | 2.56  |
| <b>14b</b> | C <sub>21</sub> H <sub>29</sub> N <sub>7</sub> O <sub>4</sub> .1.75H <sub>2</sub> SO <sub>4</sub> .0.05C <sub>2</sub> H <sub>5</sub> OH.2.4H <sub>2</sub> O | 38.36         | 5.73 | 14.84 | 8.49  | 38.23    | 5.74 | 14.78 | 8.59  |
| <b>14c</b> | C <sub>15</sub> H <sub>25</sub> N <sub>7</sub> O <sub>5</sub> .1.9H <sub>2</sub> SO <sub>4</sub> .0.1C <sub>2</sub> H <sub>5</sub> OH.2H <sub>2</sub> O     | 29.91         | 5.51 | 16.06 | 9.98  | 30.03    | 5.49 | 16.14 | 9.74  |
| <b>14d</b> | C <sub>16</sub> H <sub>27</sub> N <sub>7</sub> O <sub>4</sub> .1.9H <sub>2</sub> SO <sub>4</sub> .0.4C <sub>2</sub> H <sub>5</sub> OH                       | 34.42         | 5.70 | 16.71 |       | 34.56    | 5.67 | 16.70 |       |
| <b>14e</b> | C <sub>17</sub> H <sub>29</sub> N <sub>7</sub> O <sub>4</sub> .1.9H <sub>2</sub> SO <sub>4</sub> .0.2C <sub>2</sub> H <sub>5</sub> OH                       | 35.36         | 5.79 | 16.58 |       | 35.49    | 5.87 | 16.61 |       |
| <b>14f</b> | C <sub>15</sub> H <sub>25</sub> N <sub>7</sub> O <sub>4</sub> .2.0H <sub>2</sub> SO <sub>4</sub> .0.3C <sub>2</sub> H <sub>5</sub> OH.1.5H <sub>2</sub> O   | 30.99         | 5.65 | 16.22 | 10.61 | 31.02    | 5.40 | 16.30 | 10.49 |
| <b>17c</b> | C <sub>16</sub> H <sub>24</sub> N <sub>6</sub> O <sub>5</sub> .0.5CHCl <sub>3</sub> .0.3CH <sub>3</sub> OH                                                  | 49.59         | 6.19 | 21.22 |       | 49.72    | 6.29 | 21.17 |       |
| <b>17d</b> | C <sub>15</sub> H <sub>23</sub> N <sub>7</sub> O <sub>4</sub> .1.5H <sub>2</sub> SO <sub>4</sub> .0.8H <sub>2</sub> O                                       | 34.19         | 5.27 | 18.60 | 9.12  | 34.34    | 5.03 | 18.45 | 9.12  |
| <b>17e</b> | C <sub>16</sub> H <sub>25</sub> N <sub>7</sub> O <sub>4</sub> .1.1H <sub>2</sub> SO <sub>4</sub> .1.05H <sub>2</sub> O                                      | 37.96         | 5.83 | 19.36 | 6.95  | 37.64    | 5.84 | 19.43 | 6.81  |
| <b>17f</b> | C <sub>14</sub> H <sub>21</sub> N <sub>7</sub> O <sub>4</sub> .1.45H <sub>2</sub> SO <sub>4</sub> .0.2C <sub>2</sub> H <sub>5</sub> OH.1.3H <sub>2</sub> O  | 32.55         | 5.18 | 18.92 | 8.97  | 32.35    | 5.24 | 18.87 | 8.80  |
| <b>17j</b> | C <sub>14</sub> H <sub>21</sub> N <sub>7</sub> O <sub>4</sub> .1.9H <sub>2</sub> SO <sub>4</sub> .1.6H <sub>2</sub> O                                       | 29.68         | 4.98 | 17.31 | 10.75 | 29.54    | 4.68 | 17.05 | 10.64 |
| <b>17k</b> | C <sub>15</sub> H <sub>24</sub> N <sub>8</sub> O <sub>4</sub> .2.0 H <sub>2</sub> SO <sub>4</sub> .2.7H <sub>2</sub> O                                      | 28.81         | 5.38 | 17.92 | 10.25 | 28.93    | 5.30 | 17.66 | 10.19 |
| <b>17l</b> | C <sub>14</sub> H <sub>22</sub> N <sub>8</sub> O <sub>4</sub> .2.0 H <sub>2</sub> SO <sub>4</sub> .2.0H <sub>2</sub> O                                      | 28.09         | 5.05 | 18.72 | 10.71 | 27.81    | 5.14 | 19.10 | 10.51 |
| <b>17m</b> | C <sub>14</sub> H <sub>22</sub> N <sub>8</sub> O <sub>4</sub> .0.2 CH <sub>3</sub> OH. 0.4H <sub>2</sub> O                                                  | 44.88         | 6.25 | 29.48 |       | 44.91    | 6.17 | 29.44 |       |
| <b>18a</b> | C <sub>15</sub> H <sub>26</sub> N <sub>8</sub> O <sub>3</sub> .2.4H <sub>2</sub> SO <sub>4</sub> .0.2C <sub>2</sub> H <sub>5</sub> OH                       | 30.27         | 5.27 | 18.34 |       | 30.25    | 5.28 | 18.54 |       |
| <b>18b</b> | C <sub>20</sub> H <sub>27</sub> N <sub>7</sub> O <sub>3</sub> .2.2H <sub>2</sub> SO <sub>4</sub> .0.1C <sub>2</sub> H <sub>5</sub> OH.2.5H <sub>2</sub> O   | 28.45         | 1.36 | 4.74  |       | 28.75    | 1.38 | 4.79  |       |
| <b>18d</b> | C <sub>14</sub> H <sub>23</sub> N <sub>7</sub> O <sub>3</sub> .2.0H <sub>2</sub> SO <sub>4</sub> .0.25C <sub>2</sub> H <sub>5</sub> OH.0.7H <sub>2</sub> O  | 31.23         | 5.40 | 17.58 |       | 31.21    | 5.49 | 17.48 |       |
| <b>18e</b> | C <sub>13</sub> H <sub>21</sub> N <sub>7</sub> O <sub>3</sub> .0.25CHCl <sub>3</sub> .0.5H <sub>2</sub> O                                                   | 47.80         | 7.24 | 27.09 |       | 47.76    | 7.13 | 27.03 |       |
| <b>18f</b> | C <sub>14</sub> H <sub>23</sub> N <sub>7</sub> O <sub>3</sub> .0.5 CH <sub>3</sub> OH. 0.3H <sub>2</sub> O                                                  | 48.53         | 7.19 | 27.32 |       | 48.73    | 7.17 | 27.09 |       |
| <b>19a</b> | C <sub>15</sub> H <sub>26</sub> N <sub>8</sub> O <sub>3</sub> .2.4H <sub>2</sub> SO <sub>4</sub> .0.2C <sub>2</sub> H <sub>5</sub> OH                       | 35.73         | 5.49 | 14.44 |       | 35.92    | 5.39 | 14.49 |       |
| <b>19b</b> | C <sub>20</sub> H <sub>27</sub> N <sub>7</sub> O <sub>3</sub> .1.7H <sub>2</sub> SO <sub>4</sub> .0.05C <sub>2</sub> H <sub>5</sub> OH.3.3H <sub>2</sub> O  | 37.32         | 5.82 | 15.15 | 8.67  | 37.29    | 5.79 | 15.18 | 8.40  |
| <b>19c</b> | C <sub>13</sub> H <sub>21</sub> N <sub>7</sub> O <sub>3</sub> .0.05 CH <sub>3</sub> OH.0.1H <sub>2</sub> O                                                  | 47.97         | 6.60 | 30.00 |       | 47.70    | 6.86 | 29.95 |       |
| <b>19d</b> | C <sub>14</sub> H <sub>23</sub> N <sub>7</sub> O <sub>3</sub> .0.4 CH <sub>3</sub> OH. 0.7H <sub>2</sub> O                                                  | 43.93         | 6.19 | 27.06 |       | 44.15    | 6.27 | 27.18 |       |
| <b>21c</b> | C <sub>15</sub> H <sub>25</sub> N <sub>7</sub> O <sub>3</sub> .2.0H <sub>2</sub> SO <sub>4</sub> .2.5H <sub>2</sub> O                                       | 30.40         | 5.78 | 16.54 | 10.52 | 30.55    | 5.85 | 16.19 | 10.82 |
| <b>21d</b> | C <sub>16</sub> H <sub>27</sub> N <sub>7</sub> O <sub>3</sub> .2.5H <sub>2</sub> SO <sub>4</sub> .2.5H <sub>2</sub> O                                       | 29.72         | 5.61 | 15.16 |       | 29.86    | 5.57 | 14.81 |       |
| <b>22a</b> | C <sub>14</sub> H <sub>23</sub> N <sub>9</sub> O <sub>3</sub> .0.05CHCl <sub>3</sub> .3.5H <sub>2</sub> O                                                   | 38.84         | 6.97 | 29.01 |       | 38.54    | 6.65 | 29.25 |       |
| <b>22c</b> | C <sub>14</sub> H <sub>22</sub> N <sub>8</sub> O <sub>4</sub> .1.2C <sub>2</sub> H <sub>5</sub> OH.0.2 CH <sub>3</sub> OH                                   | 46.58         | 7.06 | 26.18 |       | 46.93    | 7.22 | 26.43 |       |

| Compound   | Empirical<br>Formula                                    | Calculated, % |      |       |      | Found, % |      |       |      |
|------------|---------------------------------------------------------|---------------|------|-------|------|----------|------|-------|------|
|            |                                                         | C             | H    | N     | S    | C        | H    | N     | S    |
| <b>23a</b> | $C_{13}H_{20}N_6O_3 \cdot 0.35CHCl_3 \cdot 0.5C_2H_5OH$ | 45.43         | 6.14 | 22.95 |      | 45.54    | 5.85 | 22.79 |      |
| <b>23b</b> | $C_{12}H_{18}N_6O_3 \cdot 0.35 CH_3OH$                  | 48.55         | 6.40 | 27.50 |      | 48.80    | 6.40 | 27.23 |      |
| <b>25b</b> | $C_{13}H_{20}ClN_5O_3S \cdot 2H_2O$                     | 39.24         | 6.07 | 17.60 |      | 39.35    | 5.97 | 17.55 |      |
| <b>25d</b> | $C_{12}H_{18}ClN_5O_3S \cdot 1.5H_2O \cdot 0.1C_2H_5OH$ | 38.96         | 5.80 | 18.32 | 8.44 | 38.98    | 5.68 | 18.29 | 8.57 |
